# Supplementary material
Source: MDPI journal article supplement (https://www.mdpi.com/2227-9717/8/8/914)
Supplement: s1 [file s1]

Supplementary Materials

# Protective effects of active compounds from *Salviae miltiorrhizae* Radix against glutamate-induced HT-22 hippocampal neuronal cell death

Hung Manh Phung <sup>1</sup>, Sullim Lee <sup>2,\*</sup> and Ki Sung Kang <sup>1,\*</sup>

<sup>1</sup> College of Korean Medicine, Gachon University, Seongnam 13120, Korea; manhspkt92@gmail.com (H.M.P.); kkang@gachon.ac.kr (K.S.K.)

<sup>2</sup> Department of Life Science, College of Bio-Nano Technology, Gachon University, Seongnam 13120, Korea; sullimlee@gachon.ac.kr (S.L.)

**Table S1.** Information of antibodies used for western blotting.

| No | Antibody                                           | Supplier                         | Catalog number | Dilution ratio |
|----|----------------------------------------------------|----------------------------------|----------------|----------------|
| 1  | p44/42 MAPK (Erk1/2)                               | Cell Signaling, Danvers, MA, USA | #9102          | 1 : 4000       |
| 2  | SAPK/JNK                                           |                                  | #9252          | 1 : 2000       |
| 3  | p38 MAPK                                           |                                  | #9212          | 1 : 2000       |
| 4  | Akt                                                |                                  | #9272          | 1 : 2000       |
| 5  | p53 (1C12) Mouse mAb                               |                                  | #2524          | 1 : 2000       |
| 6  | Phospho-p44/42 MAPK (Erk1/2) (Thr202/Tyr204)       |                                  | #9101          | 1 : 4000       |
| 7  | Phospho-SAPK/JNK (Thr183/Tyr185)                   |                                  | #9251          | 1 : 2000       |
| 8  | Phospho-p38 MAPK (Thr180/Tyr182) (12F8) Rabbit mAb |                                  | #4631          | 1 : 2000       |
| 9  | Phospho-Akt (Ser473) (193H12) Rabbit mAb           |                                  | #4058          | 1 : 2000       |
| 10 | Phospho-p53 (Ser15) (16G8) Mouse mAb               |                                  | #9286          | 1 : 2000       |
| 11 | GAPDH (14C10) Rabbit mAb                           |                                  | #4631          | 1 : 4000       |
| 12 | Anti-rabbit IgG, HRP-linked Antibody               |                                  | #7074          | 1 : 4000       |
| 13 | Anti-mouse IgG, HRP-linked Antibody                |                                  | #7076          | 1 : 4000       |

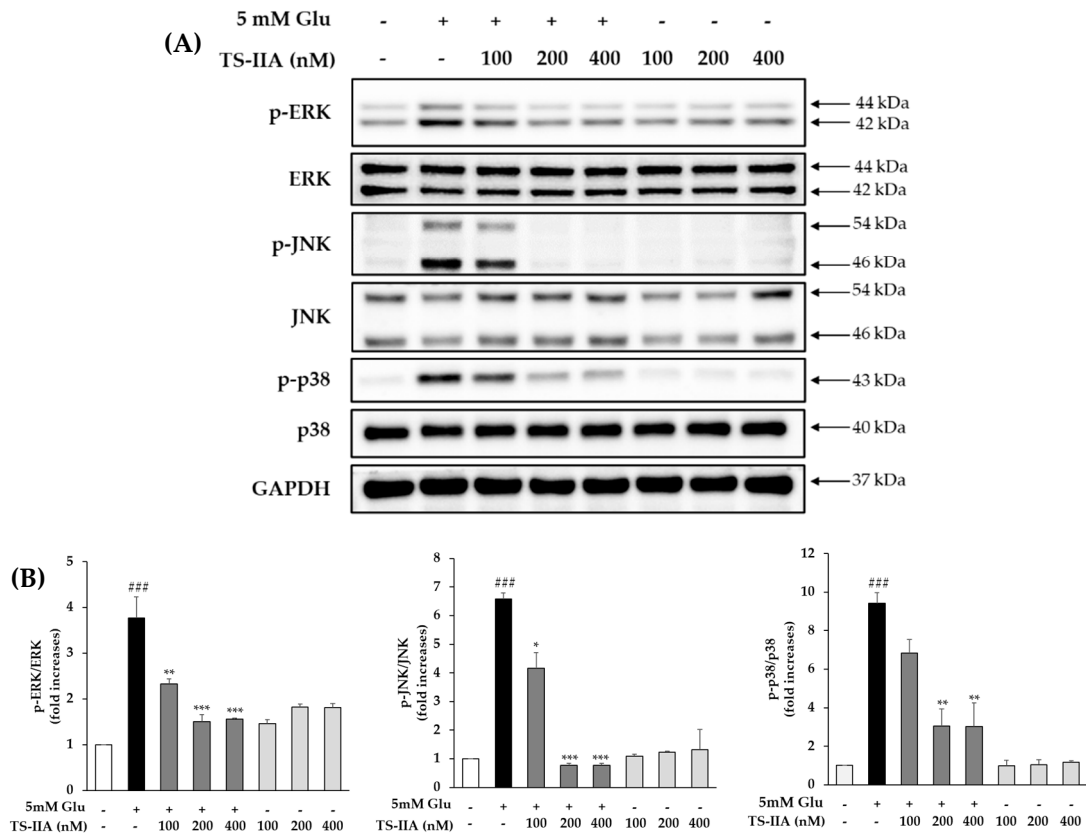

**Figure S1.** Effect of tanshinone IIA (TS-IIA) on glutamate-induced phosphorylation of MAPKs. (A) HT-22 cells were exposed to 100, 200, or 400 nM TS-IIA in the presence or absence of 5 mM glutamate for 12 h, and analyzed by immunoblotting to determine immunoreactive bands for p-JNK, JNK, p-ERK, ERK, p-p38, p38, and GAPDH. (B) The bar chart describes the fold-increase of phosphorylation of MAPKs compared with the control (N=2). ### $p < 0.001$  compared with the untreated group, \* $p < 0.05$ , \*\* $p < 0.01$ , and \*\*\* $p < 0.001$  compared with the glutamate-treated group. (TS- IIA: tanshinone IIA, Glu: glutamate).
